# Supplementary material for: Improved shape memory performance of star-shaped POSS-polylactide based polyurethanes (POSS-PLAUs)
Source: Royal Society of Chemistry journal article supplement (doi:10.1039/c5ra14742e), 2015-01-01
Supplement: c5ra14742e2.pdf [file c5ra14742e2.pdf]

## Supplementary Information

### Improved shape memory performance of star-shaped POSS-poly lactide based polyurethanes (POSS-PLAUs)

S. Y. Gu<sup>\*,a,b</sup> and X. F. Gao<sup>a</sup>

#### Characterization

<sup>1</sup>H NMR Characterization: <sup>1</sup>H NMR spectra were carried out using a Bruker DMX 500 NMR spectrometer with CDCl<sub>3</sub> as the solvent at room temperature (25 °C). Tetramethylsilane (TMS) was used as an internal standard for the analysis of chemical shifts. The number of repeating units of LA arm was calculated according to integral area ratio of d peak to c peak from <sup>1</sup>H NMR spectra as shown in Fig. S3.

FTIR Characterization: Fourier transform infrared spectroscopy (FTIR) spectra were obtained using a BRUKER AVATAR 360 ESP FT-IR by ART mode at room temperature (25 °C). All samples were scanned in the range of 400- 4000 cm<sup>-1</sup>.

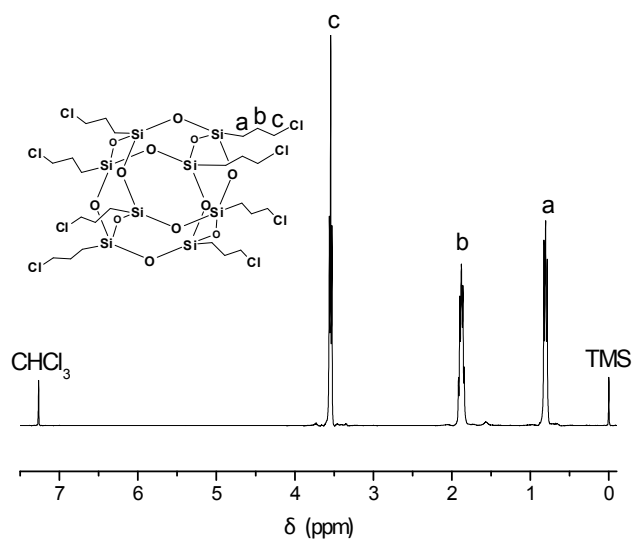

Fig. S1. The <sup>1</sup>H NMR spectrum of *octa*-(3-chloropropyl) polyhedral oligomeric silsesquioxane (POSS-Cl<sub>8</sub>).

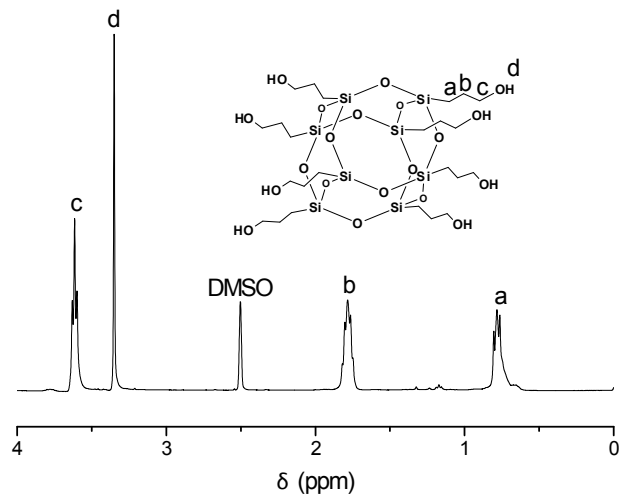

Fig S2. The  $^1\text{H}$  NMR spectrum of *octa*-(3-hydroxypropyl) polyhedral oligomeric silsesquioxane (POSS-(OH)<sub>8</sub>).

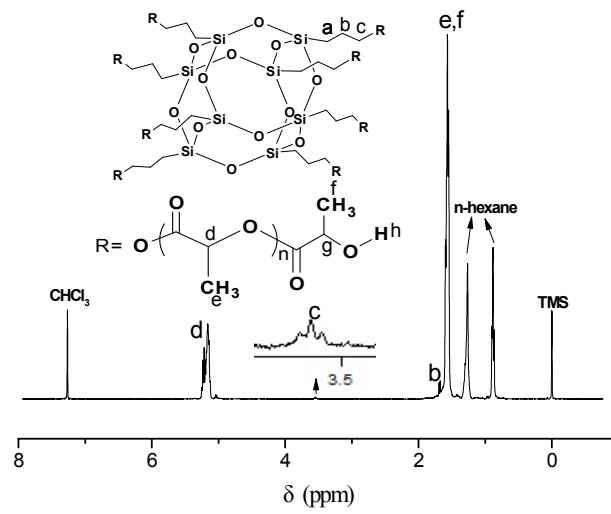

Fig S3. The  $^1\text{H}$  NMR spectrum of star-shaped POSS-PLAs.

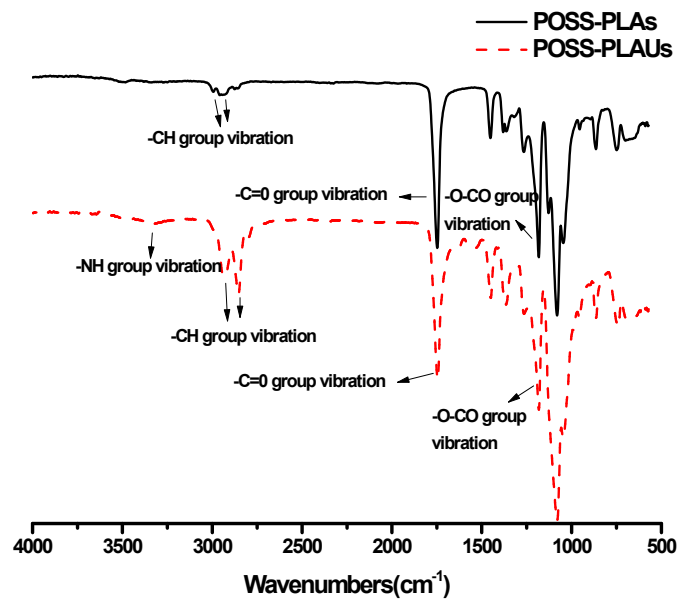

Fig S4. The FTIR spectra of star-shaped POSS-PLAs and POSS-PLAUs
